# Supplementary material for: A Machine Reading System for Assembling Synthetic Paleontological Databases
Source: PubMed Central journal article supplement (PMC4250071; doi:10.1371/journal.pone.0113523), 2014-12-01
Supplement: pone.0113523.s001.pdf [file pone.0113523.s001.pdf]

## SUPPLEMENTARY INFORMATION

### A Machine Reading System for Assembling Synthetic Paleontological Databases

Shanan E. Peters <sup>\*</sup>, Ce Zhang <sup>†</sup>, Miron Livny <sup>†</sup>, and Christopher Ré <sup>‡</sup>

<sup>\*</sup> Department of Geoscience, University of Wisconsin-Madison, Madison, WI, 53706 USA

<sup>†</sup> Department of Computer Science, University of Wisconsin-Madison, Madison, WI, 53706 USA

<sup>‡</sup> Department of Computer Science, Stanford University, Stanford, CA 94305 USA

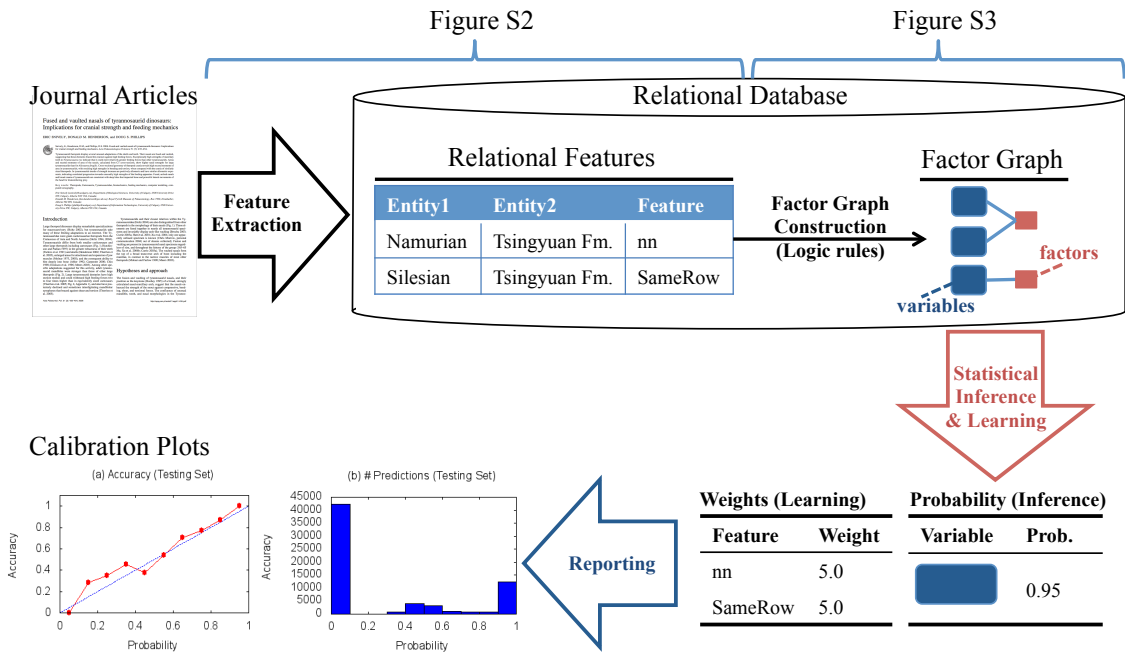

Supplementary Figure 1. Schematic representation of the PDD workflow.

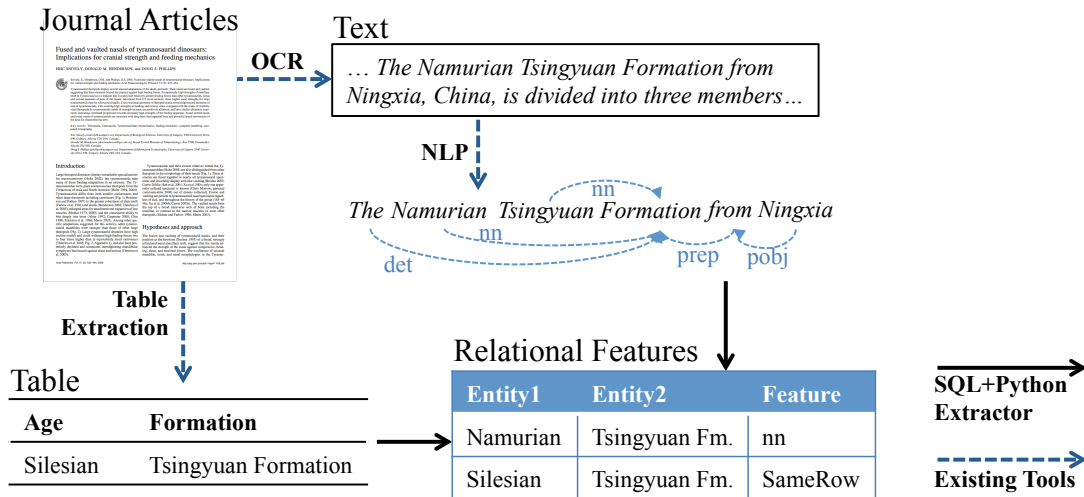

Supplementary Figure 2. Overview of PDD feature extraction. Text, tables, and images in an original document are parsed (e.g., by table position extraction or natural language). Two or more entities and the specific properties in the document (i.e., features) that relate them are expressed as a row in a database.

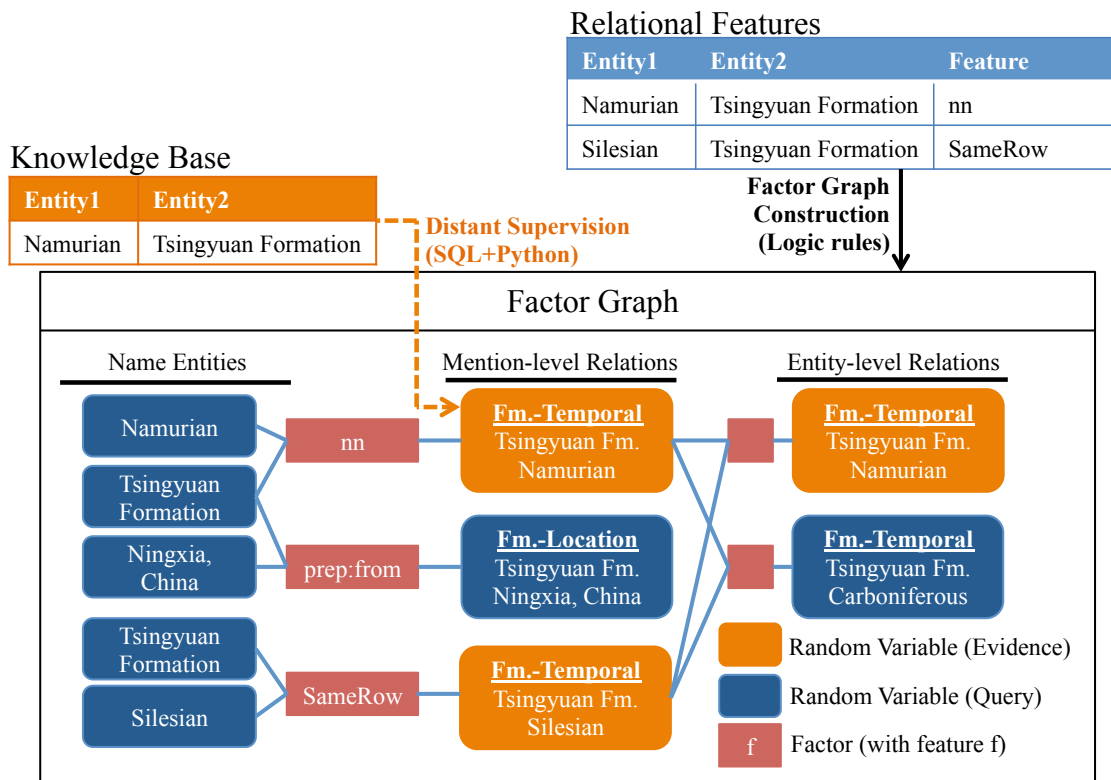

**Supplementary Figure 3.** Overview of factor graph component of PDD. Existing knowledge bases, such as data in the PBDB, are used to assess mention-level relations during distant supervision. Variables assessed for accuracy become evidence variables for statistical inference and learning steps.

| taxon                          | rank    | status     | taxon             | rank  | in ref | not in ref | incorrect | ? |
|--------------------------------|---------|------------|-------------------|-------|--------|------------|-----------|---|
| <i>Bellerophon carbonarius</i> | species | belongs to | <i>Euphemites</i> | genus |        |            |           |   |
| <i>Bellerophon urii</i>        | species | belongs to | <i>Euphemites</i> | genus |        |            |           |   |
| <i>Bucaniopsis hibernicus</i>  | species | belongs to | <i>Retispira</i>  | genus |        |            |           |   |
| <i>Euphemus konincki</i>       | species | belongs to | <i>Euphemites</i> | genus |        |            |           |   |

**Supplementary Figure 4.** Screen shot of web user interface used in blind experiment conducted by 7 human annotators. A unique link and instructions to complete the form were emailed to each participant. The wording of the instructions was as follows:

1. “in ref” means you can find this *\*exact\** fact in the document somewhere.
2. “not in ref” means you can’t find the exact fact in the document anywhere (can include typos).
3. “incorrect” means it is an incorrect fact (e.g., wrong assignment/relationship, etc.).
4. “?” means you don’t understand the fact in relation to document.

Simply clicking on the box selects it for you. You can change it etc. as you go along. Once you are done, you can go to another ref by clicking on bottom. You can come back to the ref and inspect it to make sure it looks good, change things.

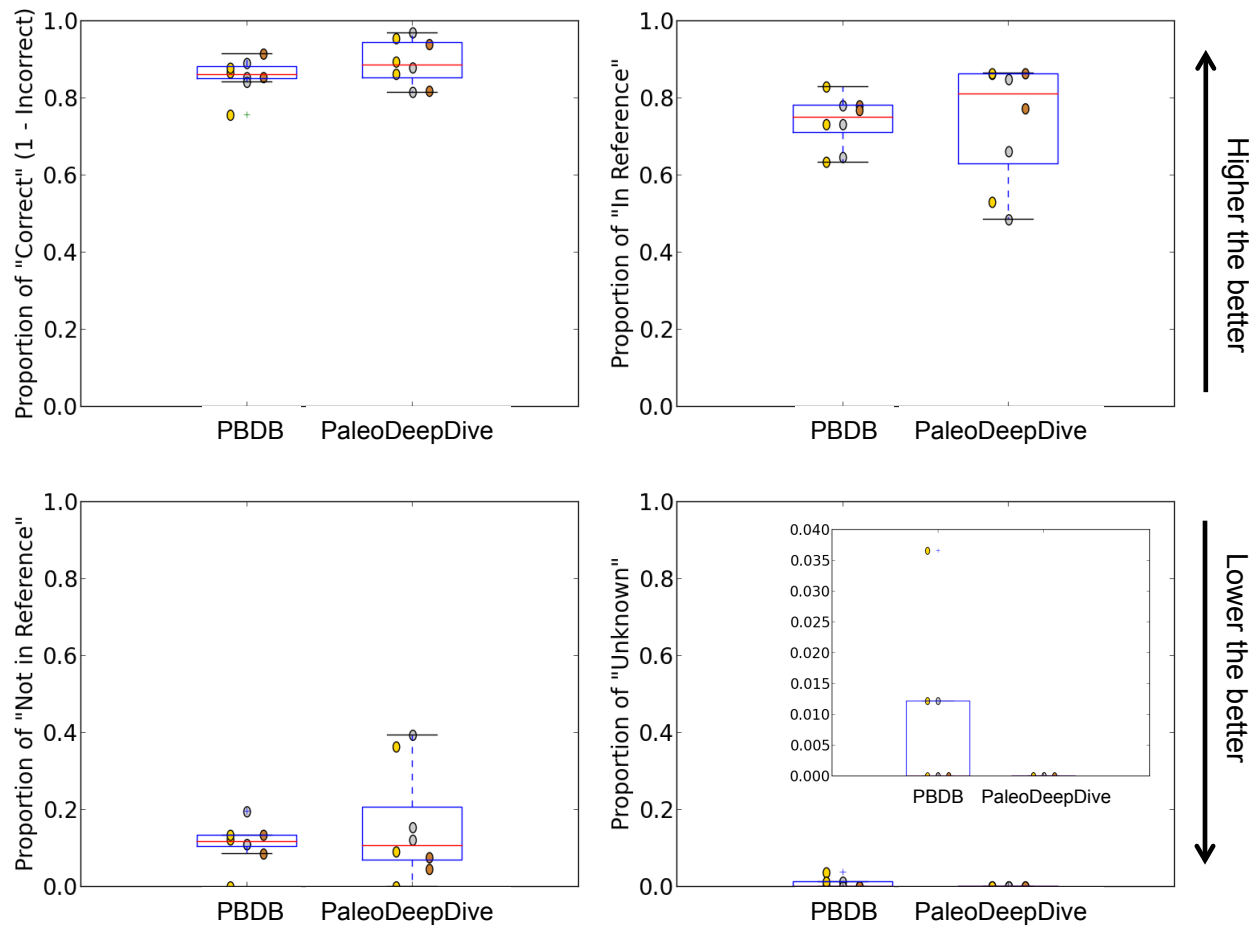

**Supplementary Figure 5.** Summary of results of annotation experiment of PDD and PBDB taxonomic extractions. Yellow, annotators with heavy PBDB governance involvement; blue, past governance involvement; red, graduate students.

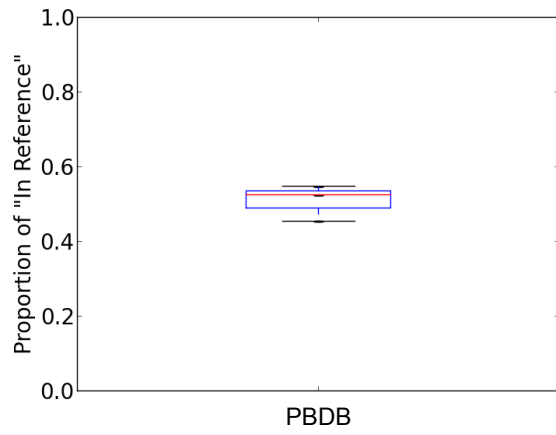

**Supplementary Figure 6.** Summary of results of annotation experiment of occurrence data, or (taxon, geologic unit, temporal interval) tuples in human-constructed PBDB. Results are for 3 volunteers, one from each of groups in Supplementary Figure 4.

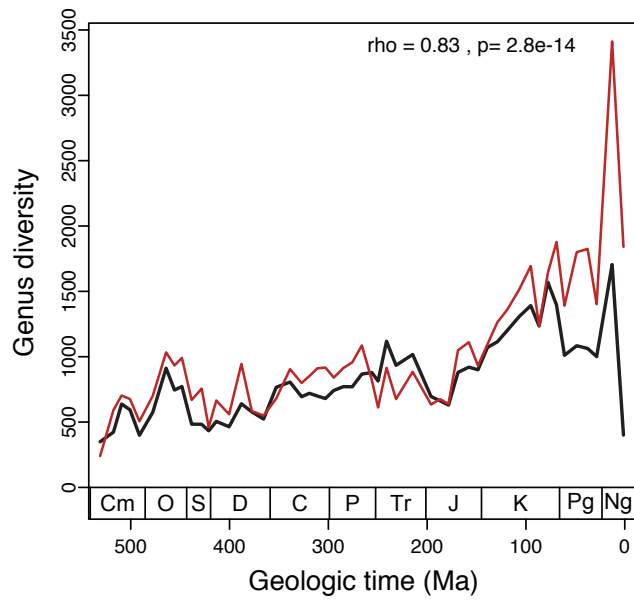

**Supplementary Figure 7.** PDD genus-level diversity (black curve) calculated using occurrences with period level or finer temporal resolution, as opposed to epoch or finer temporal resolution used in Fig. 1. The red curve shows PBDB data and is identical to the red curve in Fig. 1c.

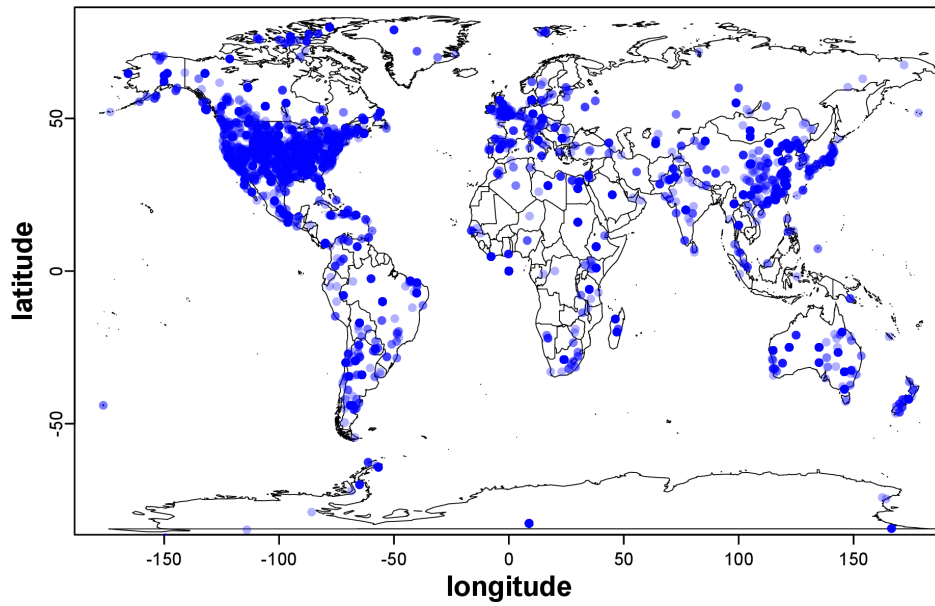

(a) Overlapping Corpus

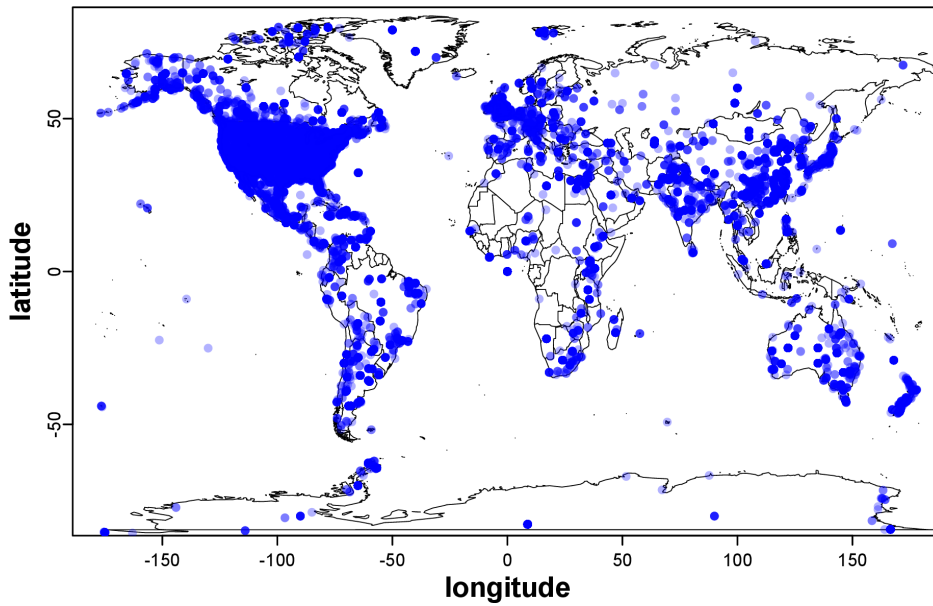

(b) Whole Corpus

**Supplementary Figure 8.** Geographic distribution of PDD-generated database. Top, location of occurrences in overlapping document set (ODS). Bottom, location of occurrences in whole document set (WDS).

| Layer                   | Features                                                                                                                                                                                                                                                  |
|-------------------------|-----------------------------------------------------------------------------------------------------------------------------------------------------------------------------------------------------------------------------------------------------------|
| Name Entities           | Dictionary (English dictionary, GeoNames, PaleoDB, Species2000, Microstrat, MySQL stop words)<br>Part-of-speech tag from StanfordCoreNLP<br>Name-entity tag from StanfordCoreNLP<br>Name entity mentions in the same sentences (paragraphs, or documents) |
| Mention-level Relations | Word sequence between name entities<br>Dependency path between name entities<br>Name-entity tag from StanfordCoreNLP<br>Table caption-content association<br>Table cell-header association<br>Section headers (for Taxonomy)                              |
| Entity-level Relations  | Temporal interval containment (e.g., Namurian $\subseteq$ Carboniferous)<br>Location containment (e.g., Ningxia, China $\subseteq$ China)<br>One formation does not likely span $> 200$ million years                                                     |

**Supplementary Table 1.** List of features and rules used in the current version of PDD. Finding the right simple features and rules can be difficult. The PDD system is designed to operate in an iterative fashion, with error analysis occurring after each round of feature and rule definition.

| Relation                     | Tuple in Knowledge             | Positive Examples                                           | Negative Examples                     |
|------------------------------|--------------------------------|-------------------------------------------------------------|---------------------------------------|
| Taxonomy                     | (Taxon, Taxon) $(t_1, t_2)$    | $\{(t_1, t_2)\}$                                            | $\{(t_1, t'_2) : t'_2 \neq t_2\}$     |
| Formation                    | (Taxon, Formation) $(t, f)$    | $\{(t, f)\}$                                                | Positive examples of other relations  |
| Formation-Temporal (Mention) | (Formation, Interval) $(t, i)$ | $\{(t, i') : intersect(i, i')\}$                            | $\{(t, i') : \neg intersect(i, i')\}$ |
| Formation-Temporal (Entity)  | (Formation, Interval) $(t, i)$ | $\{(t, i') : intersect(i, i') \wedge \neg contain(i', i)\}$ | $\{(t, i') : \neg intersect(i, i')\}$ |
| Formation-Location (Mention) | (Formation, Location) $(t, l)$ | $\{(t, l') : intersect(l, l')\}$                            | $\{(t, l') : \neg intersect(l, l')\}$ |
| Formation-Location (Entity)  | (Formation, Location) $(t, l)$ | $\{(t, l') : intersect(l, l') \wedge \neg contain(l', l)\}$ | $\{(t, l') : \neg intersect(l, l')\}$ |

**Supplementary Table 2.** List of distant supervision rules used in PDD. Function  $contain(x, y)$  and  $intersect(x, y)$  return True if the interval (or locations)  $x$  contains or intersects with  $y$ .

| Journal Name                                                          | PBDB          | PDD             |            |
|-----------------------------------------------------------------------|---------------|-----------------|------------|
|                                                                       |               | Overlapping Set | Coverage   |
| Journal of Paleontology                                               | 2,667         | 2,534           | 95%        |
| Journal of Vertebrate Paleontology                                    | 1,909         | 1,292           | 68%        |
| Palaeontology                                                         | 879           | 748             | 85%        |
| Paleontological Journal                                               | 849           | 0               | 0%         |
| American Museum Novitates                                             | 513           | 433             | 84%        |
| NULL                                                                  | 509           | 0               | 0%         |
| Acta Palaeontologica Polonica                                         | 483           | 433             | 90%        |
| Nature                                                                | 452           | 340             | 75%        |
| Cretaceous Research                                                   | 424           | 421             | 99%        |
| Gobios                                                                | 423           | 296             | 70%        |
| Ameghiniana                                                           | 394           | 21              | 5%         |
| Canadian Journal of Earth Sciences                                    | 336           | 281             | 84%        |
| Palaeogeography, Palaeoclimatology, Palaeoecology                     | 325           | 317             | 98%        |
| Vertebrata PalAsiatica                                                | 322           | 203             | 63%        |
| Science                                                               | 309           | 184             | 60%        |
| Bulletin of the American Museum of Natural History                    | 293           | 214             | 73%        |
| Geological Magazine                                                   | 269           | 24              | 9%         |
| Alcheringa                                                            | 268           | 0               | 0%         |
| American Journal of Science                                           | 257           | 53              | 21%        |
| Palaeontologische Zeitschrift                                         | 241           | 0               | 0%         |
| Journal of Mammalogy                                                  | 234           | 147             | 63%        |
| Acta Palaeontologica Sinica                                           | 232           | 3               | 1%         |
| United States Geological Survey Professional Paper                    | 231           | 156             | 68%        |
| Zoological Journal of the Linnean Society                             | 203           | 200             | 99%        |
| Contributions from the Museum of Paleontology, University of Michigan | 195           | 174             | 89%        |
| Palaeontographica Abteilung A                                         | 194           | 0               | 0%         |
| Facies                                                                | 187           | 0               | 0%         |
| Lethaia                                                               | 183           | 178             | 97%        |
| Quarterly Journal of the Geological Society of London                 | 180           | 122             | 68%        |
| Zootaxa                                                               | 180           | 0               | 0%         |
| Palaaios                                                              | 174           | 164             | 94%        |
| Annals of Carnegie Museum                                             | 172           | 25              | 15%        |
| Proceedings of the United States National Museum                      | 149           | 0               | 0%         |
| Neues Jahrbuch fr Geologie und Paleontologie, Abhandlungen            | 147           | 0               | 0%         |
| Review of Palaeobotany and Palynology                                 | 147           | 146             | 99%        |
| American Journal of Botany                                            | 147           | 87              | 59%        |
| Proceedings of the Academy of Natural Sciences of Philadelphia        | 142           | 40              | 28%        |
| Journal of Human Evolution                                            | 135           | 122             | 90%        |
| Proceedings of the National Academy of Sciences                       | 133           | 51              | 38%        |
| Journal of Systematic Palaeontology                                   | 132           | 27              | 20%        |
| Geodiversitas                                                         | 131           | 0               | 0%         |
| Acta Geologica Sinica                                                 | 130           | 78              | 60%        |
| Bulletins of American Paleontology                                    | 129           | 0               | 0%         |
| Bulletin de la Societe Geologique de France                           | 122           | 0               | 0%         |
| Palontologische Zeitschrift                                           | 115           | 0               | 0%         |
| Rivista Italiana di Paleontologia e Stratigrafia                      | 115           | 0               | 0%         |
| Psyche                                                                | 111           | 1               | 1%         |
| Annals of the South African Museum                                    | 104           | 0               | 0%         |
| Tulane Studies in Geology and Paleontology                            | 103           | 0               | 0%         |
| Paleontological Research                                              | 102           | 92              | 90%        |
| Other Sources                                                         | 30,851        | 2,175           | 7%         |
| <b>Total</b>                                                          | <b>47,632</b> | <b>11,782</b>   | <b>25%</b> |

**Supplementary Table 3.** Distribution of documents in the overlapping document set. "NULL" corresponds to a NULL title document type field in the PBDB.



| Taxon Name                   | Rank    | Not Found on Google (Error Candidate) |
|------------------------------|---------|---------------------------------------|
| Cirquella espinata           | species |                                       |
| Echinophyllia orpheensis     | species |                                       |
| Fenestella huascatayana      | species |                                       |
| Epigondolella primitia       | species |                                       |
| Palaeospheniscus gracilis.   | species |                                       |
| Pygurus carinatus            | species | ×                                     |
| Arionellus tripunctatus      | species |                                       |
| Phacostylus amphistylus      | species |                                       |
| Circotheca multisulcatus     | species |                                       |
| Aulotortus praegaschei       | species |                                       |
| Leptaena demissa             | species |                                       |
| Xinjiangchelys laticentralis | species |                                       |
| Conotreta lanensis           | species | ×                                     |
| Martellia ichangensis        | species |                                       |
| Procavia antiqua             | species |                                       |
| Chermidae                    | family  |                                       |
| Monophyllus cubanus          | species |                                       |
| Gazella soemmeringi          | species |                                       |
| Pinna subspatulata           | species |                                       |
| Polacanthus faxi             | species | ×                                     |
| Homotherium latidens         | species |                                       |
| Platanus primaeva            | species |                                       |
| Rhopalocanium satelles       | species |                                       |
| Cryptobairdia forakerensis   | species |                                       |
| Naiadites elongata           | species |                                       |
| Staurocephalus murchisoni    | species |                                       |
| Serpula anguinus             | species |                                       |
| Glycymeris angusticostata    | species |                                       |
| Eomunidopsis eutecta         | species |                                       |
| Actinocrinites gibsoni       | species |                                       |
| Zhelestes tes                | species | ×                                     |
| Spinocyrtia ascendens        | species |                                       |
| Belemnopsis alexandri        | species |                                       |
| Agaricocrinus nodulosus      | species |                                       |
| Oreochromis shiranus         | species |                                       |
| Atrichornithidae             | family  |                                       |
| Neltneria jaqueti            | species |                                       |
| Eurydice affinis             | species |                                       |
| Nummulites burdi             | species |                                       |
| Diacalymene marginata        | species |                                       |
| Scapteriscus didactylus      | species |                                       |
| Enhydriodon campanii         | species |                                       |
| Offneria nicoli              | species | ×                                     |
| Propetrosia pristina         | species |                                       |
| Podocarpus campbelli         | species |                                       |
| Graffhamicrinus aristatus    | species |                                       |
| Productina sampsoni          | species |                                       |
| Bufina bicornuta             | species |                                       |
| Coccolithus staurion         | species |                                       |
| Ernanodon vas                | species | ×                                     |

**Supplementary Table 4.** Error Analysis of Taxon Entity Extractions in PDD

| Reference No. | Genus                   | Correct | Extracted by PBDB |
|---------------|-------------------------|---------|-------------------|
|               | Acrodonta               | ✓       |                   |
|               | Mastodontosaurus        | ✓       |                   |
| 28945         | Mesodapedon             | ✓       |                   |
|               | Rhynchosaurus           | ✓       | ✓                 |
|               | Scaphonyx               | ✓       |                   |
|               | Spirorbis               | ✓       |                   |
|               | Stenaulorhynchus        | ✓       |                   |
| 34109         |                         |         |                   |
| 28146         |                         |         |                   |
| 38697         | Hazelia                 | ✓       | ✓                 |
|               | Leptomitus              | ✓       | ✓                 |
| 32675         |                         |         |                   |
| 33994         | Gastropoda              |         |                   |
|               | Heterostropha           | ✓       |                   |
|               | Mathilda                | ✓       |                   |
|               | Mollusca                | ✓       |                   |
|               | Stenoglossa             | ✓       |                   |
| 27115         |                         |         |                   |
|               | Archaeopterodactyloidea | ✓       |                   |
|               | Beipiaopterus           | ✓       |                   |
|               | Boreopteridae           | ✓       |                   |
|               | Boreopterus             | ✓       |                   |
|               | Eopteranonodon          | ✓       |                   |
| 41374         | Eosipterus              | ✓       |                   |
|               | Feilongus               | ✓       |                   |
|               | Gegepterus              | ✓       |                   |
|               | Moganopterus            | ✓       | ✓                 |
|               | Ningchengopterus        | ✓       |                   |
|               | Ornithocheiroidea       | ✓       |                   |
|               | Zhenyuanopterus         | ✓       |                   |
| 12054         |                         |         |                   |
|               | Bactrosaurus            | ✓       |                   |
|               | Dyoplosaurus            | ✓       |                   |
|               | Gorgosaurus             | ✓       |                   |
| 13061         | Hypacrosaurus           | ✓       |                   |
|               | Mandschurosaurus        | ✓       | ✓                 |
|               | Nodosauridae            | ✓       | ✓                 |
|               | Tanius                  | ✓       |                   |
| Human Recall  |                         |         | 18%               |

**Supplementary Table 5.** Error Analysis: PDD Extractions

| Reference No. | Genus              | Correct | Extracted by PDD | Error Reason                |
|---------------|--------------------|---------|------------------|-----------------------------|
| 28945         | Rhynchosaurus      | ✓       | ✓                |                             |
| 34109         | Austromola         | ✓       |                  | Not enough context features |
|               | Odontoceti         | ✓       |                  | Not enough context features |
| 28146         | Cerapoda           | ✓       |                  | Not enough context features |
| 38697         | Hazelia            | ✓       | ✓                |                             |
|               | Leptomitius        | ✓       | ✓                |                             |
|               | Protospongia       | ✓       |                  | Not enough context features |
| 32675         | Tommotia           | ✓       |                  | Not enough context features |
|               | Anticonulus        | ✓       |                  |                             |
|               | Ataphrus           | ✓       |                  |                             |
|               | Austriacopsis      | ✓       |                  |                             |
|               | Discohelix         | ✓       |                  |                             |
|               | Emarginula         | ✓       |                  |                             |
| 33994         | Eucyclidae         | ✓       |                  | Table recognition failure   |
|               | Eucyclus           | ✓       |                  |                             |
|               | Guidonia           | ✓       |                  |                             |
|               | Neritopsis         | ✓       |                  |                             |
|               | Plectotrochus      | ✓       |                  |                             |
|               | Proacirsa          | ✓       |                  |                             |
|               | Pseudorhytidopilus | ✓       |                  |                             |
|               | Astreptodictya     | ✓       |                  |                             |
|               | Athropragma        | ✓       |                  |                             |
|               | Batostoma          | ✓       |                  |                             |
|               | Bryozoa            | ✓       |                  |                             |
|               | Bythopora          | ✓       |                  |                             |
|               | Calopora           | ✓       |                  |                             |
|               | Coeloclema         | ✓       |                  |                             |
|               | Constellaria       | ✓       |                  |                             |
|               | Contexta           | ✓       |                  |                             |
|               | Diploclema         | ✓       |                  |                             |
|               | Echinodermata      | ✓       |                  |                             |
| 27115         | Graptodictya       | ✓       |                  | OCR error                   |
|               | Helopora           | ✓       |                  |                             |
|               | Nicholsonella      | ✓       |                  |                             |
|               | Otoseetaxis        | ✓       |                  |                             |
|               | Pachydictya        | ✓       |                  |                             |
|               | Phylloporina       | ✓       |                  |                             |
|               | Porifera           | ✓       |                  |                             |
|               | Prasopora          | ✓       |                  |                             |
|               | Spongiostroma      | ✓       |                  |                             |
|               | Stictopora         | ✓       |                  |                             |
|               | Stictoporella      | ✓       |                  |                             |
|               | Trilobita          | ✓       |                  |                             |
| 41374         | Moganopterus       | ✓       | ✓                |                             |
| 12054         | Neosaurus          | ✓       |                  | Not enough context features |
| 13061         | Mandschurosaurus   | ✓       | ✓                |                             |
|               | Nodosauridae       | ✓       | ✓                |                             |
| PDD Recall    |                    |         | 11%              |                             |

**Supplementary Table 6.** Error Analysis: PBDB Extractions

| Relation  | PBDB | PDD | $p = 0.05$ |
|-----------|------|-----|------------|
| Taxonomy  | 92%  | 97% | 0          |
| Temporal  | 89%  | 96% | +          |
| Location  | 90%  | 92% | 0          |
| Formation | 84%  | 94% | +          |

**Supplementary Table 7.** Comparison of Accuracies of PDD and PBDB. The column  $p = 0.05$  is the significant test of one-tail Welch's  $t$ -test, where "+" means significant given the corresponding  $p$ -value, and "0" otherwise. The value 0.05 is picked by following the default setting of R.

| Journal Name                                          | 1845-<br>-1959 | 1960-<br>-1969 | 1970-<br>-1979 | 1980-<br>-1989 | 1990-<br>-1999 | 2000-<br>-2009 | 2010<br>-2013 | Total         |
|-------------------------------------------------------|----------------|----------------|----------------|----------------|----------------|----------------|---------------|---------------|
| American Journal of Science                           | 2489           |                | 727            | 41             |                | 245            | 138           | 3640          |
| American Midland Naturalist                           | 2893           | 1022           | 1149           | 989            | 852            | 842            | 189           | 7936          |
| American Museum Novitates                             | 1974           | 413            | 288            | 272            | 320            | 388            | 98            | 3753          |
| Annales de Palontologie                               |                |                |                |                | 29             | 206            | 73            | 308           |
| Annals of Carnegie Museum                             |                |                |                |                |                | 82             | 38            | 120           |
| Bulletin of the American Museum of Natural History    | 1318           | 93             | 105            | 72             | 52             | 196            | 65            | 1901          |
| Comptes Rendus Palevol                                |                |                |                |                |                | 679            | 270           | 949           |
| Cretaceous Research                                   |                |                |                | 287            | 457            | 732            | 393           | 1869          |
| Geological Journal                                    | 136            | 418            | 338            | 1116           | 680            | 662            | 423           | 3773          |
| Geological Society America Bulletin                   | 276            | 796            |                | 788            | 1158           | 1089           | 486           | 4593          |
| Geology                                               |                |                | 1177           | 2675           | 2990           | 3024           | 1261          | 11127         |
| Global and Planetary Change                           |                |                |                | 20             | 469            | 1070           | 376           | 1935          |
| Gobios                                                |                | 13             | 442            | 1072           | 1294           | 753            | 167           | 3741          |
| International Geology Review                          | 87             | 1482           | 1780           | 1541           | 724            | 635            | 353           | 6602          |
| Journal of Asian Earth Sciences                       |                |                |                |                | 149            | 1162           | 1123          | 2434          |
| Journal of Geology                                    | 5782           | 736            | 929            | 754            | 671            | 516            | 153           | 9541          |
| Journal of Human Evolution                            |                |                | 859            | 890            | 759            | 1067           | 597           | 4172          |
| Journal of Mammalogy                                  | 3023           | 1633           | 1509           | 1452           | 1336           | 1506           | 438           | 10897         |
| Journal of Paleontology                               | 2552           | 1500           | 1438           | 1297           | 1172           | 2224           | 643           | 10826         |
| Journal of South American Earth Sciences              |                |                |                | 79             | 423            | 666            | 414           | 1582          |
| Journal of Systematic Palaeontology                   |                |                |                |                |                | 113            | 110           | 223           |
| Journal of Vertebrate Paleontology                    |                |                |                | 365            | 636            | 2152           | 934           | 4087          |
| Journal of the Geological Society                     |                |                |                |                | 329            | 946            | 346           | 1621          |
| Lethaia                                               |                | 104            | 830            | 978            | 992            | 738            | 371           | 4013          |
| Mammalian Species                                     |                | 1              | 122            | 224            | 284            | 216            |               | 847           |
| Marine Micropaleontology                              |                |                | 85             | 262            | 469            | 646            | 156           | 1618          |
| Micropaleontology                                     | 202            | 375            | 302            | 264            | 270            | 316            |               | 1729          |
| New Zealand Journal of Geology and Geophysics         | 121            | 733            | 730            | 519            | 484            | 403            | 115           | 3105          |
| PALAIOS                                               |                |                |                | 290            | 567            | 677            | 237           | 1771          |
| Palaeogeography, Palaeoclimatology, Palaeoecology     |                | 191            | 600            | 1108           | 1812           | 3221           | 1191          | 8123          |
| Palaeontology                                         | 48             | 461            | 477            | 446            | 493            | 1470           | 560           | 3955          |
| Palaios                                               |                |                |                |                |                | 620            | 287           | 907           |
| Paleobiology                                          |                |                | 184            | 422            | 337            | 866            | 260           | 2069          |
| Paleontological Research                              |                |                |                |                |                | 192            | 88            | 280           |
| Palynology                                            |                |                | 45             | 140            | 132            | 232            | 119           | 668           |
| Proc. of AASP                                         |                |                | 79             |                |                |                |               | 79            |
| Proceedings of the Geologists' Association            | 3514           | 430            | 415            | 416            | 404            | 394            | 273           | 5846          |
| Quarterly Journal of the Geological Society of London | 3063           | 177            | 19             |                |                |                |               | 3259          |
| Review of Palaeobotany and Palynology                 |                | 241            | 427            | 705            | 1031           | 887            | 406           | 3697          |
| Revue de Micropaleontologie                           |                |                |                |                | 104            | 262            | 72            | 438           |
| Rocky                                                 |                |                | 88             | 118            | 77             | 96             | 33            | 412           |
| The Micropaleontologist                               | 163            |                |                |                |                |                |               | 163           |
| Transactions of the Kansas Academy of Science         | 2107           | 611            | 307            | 263            | 236            | 293            | 48            | 3865          |
| USGS Open-File Report                                 | 403            | 466            | 2399           | 6480           | 5060           | 726            | 243           | 15777         |
| United States Geological Survey Bulletin              | 2302           | 626            | 320            | 614            | 454            | 1              | 1             | 4318          |
| United States Geological Survey Professional Paper    | 596            | 721            | 733            | 465            | 227            | 71             | 54            | 2867          |
| Zoological Journal of the Linnean Society             | 1165           | 121            | 363            | 483            | 487            | 638            | 392           | 3649          |
| Acta Palaeontologica Polonica                         | 50             | 118            | 180            | 196            | 242            | 564            | 272           | 1622          |
| Canadian Journal of Earth Sciences                    |                | 530            | 1865           | 1981           | 1643           | 1077           | 377           | 7473          |
| Oklahoma Geology Notes                                |                | 15             | 58             | 60             | 56             | 39             | 3             | 231           |
| Vertebrata Palasiatica                                | 136            | 237            | 225            | 333            | 262            | 272            | 119           | 1584          |
| Biodiversity Heritage Library                         |                |                |                |                |                |                |               | 97129         |
| <b>Total</b>                                          |                |                |                |                |                |                |               | <b>277309</b> |

Supplementary Table 8. Statistics of Whole Document Set (WDS).

|                              | ODS        | WDS         | Ratio (WDS/ODS) |
|------------------------------|------------|-------------|-----------------|
| # Variables                  | 13,138,987 | 292,314,985 | 22×             |
| # Evidence Variables         | 980,023    | 2,066,272   | 2×              |
| # Factors                    | 15,694,556 | 308,943,168 | 20×             |
| # Distinct Features (Weight) | 945,117    | 12,393,865  | 13×             |
| Documents                    | 11,782     | 280,280     | 23×             |

Supplementary Table 9. Factor graph statistics in the overlapping and whole document sets. Evidence variables are those variables for which distant supervision has contributed an expectation. The scaling of evidence variables from the ODS to the WDS reflects the fact that most of the training data used by PDD derives from the PBDB data in the ODS.

| Year | Volume | Issue     | Reference Title                                                                                                                                     |
|------|--------|-----------|-----------------------------------------------------------------------------------------------------------------------------------------------------|
| 1993 | 13     | 3, suppl. | Ontogenetic changes in hind limb proportions within the Ghost Ranch population of <i>Coelophysis bauri</i>                                          |
| 2003 | 23     | 3         | New dromomerycids (Mammalia: Artiodactyla) from the middle Miocene Sharktooth Hill Bonebed, California, and the systematics of the craniocerotinins |
| 2002 | 22     | 3         | Paleontology and stratigraphy of the Tecolotlan Basin, Jalisco, Mexico                                                                              |
| 2004 | 24     | 3         | A new Miocene sperm whale (Cetacea, Physeteridae) from Virginia                                                                                     |
| 2003 | 23     | 3, suppl. | A preliminary Prosauropoda phylogeny with comments on Brazilian basal Sauropodomorpha                                                               |
| 2005 | 25     | 3         | A revised faunal list for the Carmel Church Quarry, Caroline County, Virginia                                                                       |
| 1994 | 14     | 3, suppl. | Preliminary report on the microvertebrate fauna from the Late Cretaceous Bauru strata near Peipolis, Minas Gerais, Brazil                           |
| 1993 | 13     | 3, suppl. | Sedimentology and taphonomy of the Little Houston Quarry, Morrison Formation (Upper Jurassic), northeast Wyoming                                    |
| 1986 | 6      | 3         |                                                                                                                                                     |
| 2002 | 22     | 3         | A flora and faunal list of specimens recovered from the Big Pig Dig, Badlands National Park, South Dakota                                           |

**Supplementary Table 10.** A Random Sample of PBDB References in *Journal of Vertebrate Paleontology* that Do Not Appear in the Overlapping Corpus.

| Year | Volume | Issue | Reference Title                                                                            |
|------|--------|-------|--------------------------------------------------------------------------------------------|
| 1905 | 22     | NULL  |                                                                                            |
| 2006 | 312    | NULL  | Comment on "The brain of LBI, <i>Homo floresiensis</i> "                                   |
| 1984 | 224    | NULL  |                                                                                            |
| 1885 | 5      | 116   | Lesquereux's Cretaceous and Tertiary Flora                                                 |
| 1991 | 251    | NULL  | New fossil evidence on the sister-group of mammals and early Mesozoic faunal distributions |
| 1990 | 249    | NULL  |                                                                                            |
| 1900 | 11     | 282   | The vertebral formula in <i>Diplodocus Marsh</i>                                           |
| 1997 | 278    | NULL  | A tribosphenic mammal from the Mesozoic of Australia                                       |
| 1905 | 22     | 568   | The occurrence of ichthyosaur-like remains in the Upper Cretaceous of Wyoming              |
| 1934 | 79     | 2039  | A change of names                                                                          |

**Supplementary Table 11.** A Random Sample of PBDB References in *Science* that Do Not Appear in the Overlapping Corpus.

|                          |                    | ODS       | WDS         | Ratio (WDS/ODS) |
|--------------------------|--------------------|-----------|-------------|-----------------|
| Mention-level Candidates | Taxon              | 6,049,257 | 133,236,518 | 22×             |
|                          | Formation          | 523,143   | 23,250,673  | 44×             |
|                          | Interval           | 1,009,208 | 16,222,767  | 16×             |
|                          | Location           | 1,096,079 | 76,688,898  | 76×             |
|                          | Opinions           | 1,868,195 | 27,741,202  | 15×             |
|                          | Taxon-Formation    | 545,628   | 4,332,132   | 8×              |
|                          | Formation-Temporal | 208,821   | 3,049,749   | 14×             |
| Entity-level Result      | Formation-Location | 239,014   | 5,577,546   | 23×             |
|                          | Authorities        | 163,595   | 1,710,652   | 10×             |
|                          | Opinions           | 192,365   | 6,605,921   | 34×             |
|                          | Collections        | 23,368    | 125,118     | 5×              |
|                          | Occurrences        | 93,445    | 539,382     | 6×              |
|                          | Documents          | 11,782    | 280,280     | 23×             |

**Supplementary Table 12.** Extraction statistics for the overlapping and whole document sets. Authorities refers to distinct taxa (identified by name and, optionally, ranks and authors).

| Relation  | # Annotations | Precision | Recall |
|-----------|---------------|-----------|--------|
| Taxonomy  | 933           | 97%       | 39%    |
| Temporal  | 478           | 96%       | 69%    |
| Location  | 655           | 92%       | 36%    |
| Formation | 2,271         | 94%       | 21%    |

**Supplementary Table 13.** Statistics of Annotations Collected and Quality Score for Each Relation

# 1 Extensions

## 1.1 Body Size Extraction

In order to extract body size estimates from biological illustrations, we need to extract the relation:

$(Taxon, FigureName, FigureLabel, Magnification, ImageArea)$

where *ImageArea* is a region on the PDF with known DPI so that the actual size of the image on a printed document is known. The following table is an example of the target extracted relation.

|                                      |          |    |      |                                                                                     |
|--------------------------------------|----------|----|------|-------------------------------------------------------------------------------------|
| <i>Vediproductus wedberensis</i>     | Fig. 381 | 2a | X1   | 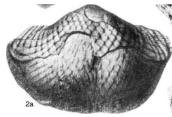 |
| <i>Compressoproductus compressus</i> | Fig. 382 | 1a | X0.8 |  |
| <i>Devonoproductus walcotti</i>      | Fig. 383 | 1b | X2.0 |  |

There were two steps in the process: (1) Image processing, and (2) text extraction. In PDD, these two components are done jointly in the same factor graph.

**Image Processing.** The goal of the image processing component is to associate each image area with a figure label. To achieve this, PDD needs to (1) detect image areas and figure labels from PDF documents, and (2) associate image areas with figure labels. Supplementary Figure 9 illustrates these two steps.

**Detection of Image Areas and Figure Labels.** The following steps were taken: (1) Edge detection; (2) Watershed Segmentation; (3) Image Dilation; and (4) Connected-component Detection (Supplementary Figure 9). Standard online-tutorials were followed, with one variant for Image Dilation. In this step, one needs to specify a parameter for dilation. Instead of specifying one value for the parameter, we tried a range of parameters and generate different versions of segmentations. PDD then trained a logistic regression classifier to choose between these segments trained on a human-labeled corpus.

**Association of Image Areas with Figure Labels.** After recognizing a set of image regions and their corresponding OCR results, PDD attempted to predict the association of figure labels and image areas, as shown in Supplementary Figure 9. Similar to relation extraction, PDD introduces a Boolean random variable for each label and image area pair. It then builds a logistic regression model using features such as the distance between label and image areas, and whether a label is nearest to an image area and vice versa.

**Text Extraction.** PDD also extracts information from text, as shown in Supplementary Figure 10. This extraction phase is similar to what was used when extracting fossil occurrence-related relations. In the name entity recognition component, PDD extracts different types of mentions, including Figure name (e.g., “Fig. 3”), Figure labels (e.g., “3a-c”), Taxon (e.g., “*B. rara*”), and magnitude (e.g., “X1”). Supplementary Figure 10 shows an example of these mentions (raw text with OCR errors). PDD then extracts relations between these mentions using the same set of features as other diversity-related relations.

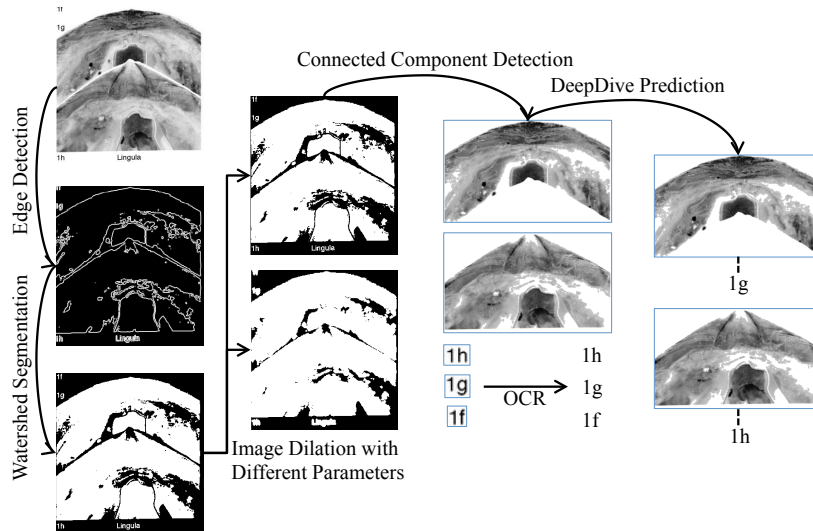

**Supplementary Figure 9.** Image Processing Component for Body Size Extraction. Note that this examples contains the illustration of a *partial* body.

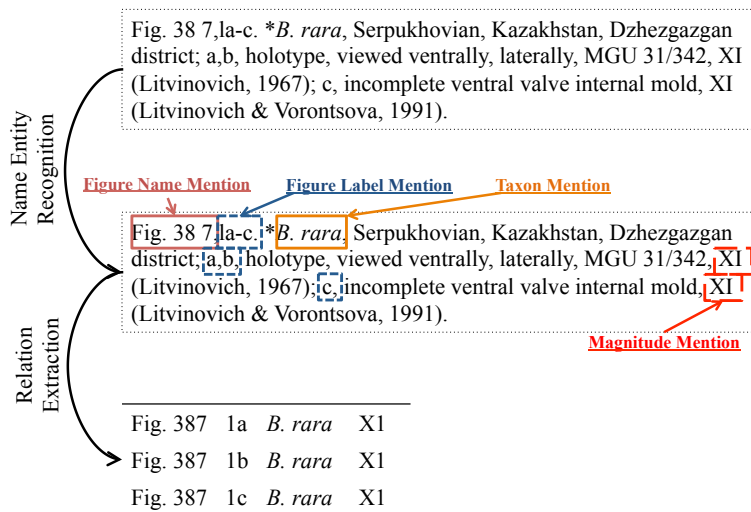

**Supplementary Figure 10.** Relation Extraction Component for Body Size Extraction.

**Joint Inference.** Both the image processing component and the text extraction component results in a factor graph populating two relations with schema

$(FigureLabel, ImageArea)$

and

$(Taxon, FigureName, FigureLabel, Magnitude)$ .

PDD joins these two intermediate relations to form a large factor graph to populate the target relation. Joint inference on the whole factor graph is then executed.



## 1.2 Body Size Extraction Validation

**Corpus.** Other researchers [1] recently compiled body size measurements by manually measuring illustrations and reading captions in the *Treatise on Invertebrate Paleontology*. Of the 55 volumes now accessible, humans have made measurements from part H, I, K, L, N, O, P, Q, R, S, T, U. We created from these documents the following three sets:

1. **Testing Corpus (With Ground Truth).** Part H.
2. **Testing Corpus (Without Ground Truth).** Part A, B, C, D, E, F, G, W, V.
3. **Training Corpus.** Part I, K, L, N, O, P, Q, R, S, T, U.

We used the Training Corpus to generate training data for distant supervision. We compared our results with those of human annotators using the Testing Corpus (With Ground Truth). The Testing Corpus (Without Ground Truth) shows that PDD helps to extend the body size database with new extractions that are not provided by human annotators.

**Results on Testing Corpus (With Ground Truth).** PDD is able to to achieve high precision and slightly higher recall than human when extracting body size measurements and their relations.

**Precision.** We measured the precision of PDD by randomly sampling 100 extracted instances of the target relation and manually annotate those extractions. We find that the accuracy is more than 92%.

**Recall.** We next counted the number of distinct (genus, figure name, figure label) tuples that are extracted by humans and PDD on the same set of documents. We find that human extracted 4,837 distinct tuples, and PDD extracted 5,783 distinct tuples, or 20% more. The primary reason for the increase is the complete extraction of measurements for all parts of a figure (e.g., “1a-f”). Humans typically extract only one part.

Although selective data extraction is often a decision made for the sake of expediency and because not all images provide optimal orientations for the dimensions being targeted by a given investigation, extracting complete measurements and associated textual descriptions establishes the foundation for more complete morphometric analyses.

**Results on Testing Corpus (Without Ground Truth).** PDD is able to extract facts on documents that have not yet been processed by humans. PDD processed Parts A, B, C, D, E, F, G, V, W of the *Treatise on Invertebrate Paleontology*, which have not yet been processed for body size by [1]. PDD extracts 7K distinct (genus, figure name, figure label) tuples from these documents.

## 1.3 Multi-linguistic Extraction

**Corpus.** We followed a similar protocol as we used to collect the overlapping corpus for English documents. We identified the top-20 journals ranked by the number of journal articles in PBDB, and attempted to download articles from their web site. Access was limited to *Vertebrata Palasiatica* (Chinese), *Stuttgarter Beitrage zur Naturkunde* (German), and *Eclogae Geologicae Helvetiae* (German). A total of 1,583 Chinese journal articles and 4,393 German journal articles were obtained in this way. We used the same protocol to map these journal articles to articles in PBDB. Of these, there were 47 articles in Chinese and 56 German articles that overlapped with the PBDB.

|                   | English                   | Chinese                   | German                    | Dictionary Source |
|-------------------|---------------------------|---------------------------|---------------------------|-------------------|
| Rock Formation    | Formation                 | 组                         | Formation                 | Manual            |
|                   | Clay                      | 石                         | Ton                       |                   |
| Temporal Interval | Late Cretaceous           | 晚白垩世                      | Oberkreide                | Manual            |
|                   | Cretaceous                | 白垩世                       | Kreide                    |                   |
| Location          | United States             | 美国                        | Vereinigte Staaten        | geonames.org      |
| Taxon             | <i>Aeschnidium densum</i> | <i>Aeschnidium densum</i> | <i>Aeschnidium densum</i> | All in Latin      |

**Protocol.** We compared the extractions of PDD in the overlapping set with the PBDB extractions on the same set of documents. Our way of assessing quality is recall for the tuple

$$(Taxon, TimeInterval)$$

This tuple is language-independent because (1) taxon has unified Latin-representation in all English, Chinese, and German articles; and (2) time Intervals and their hierarchical relationships are known by PDD for all languages. To extract this tuple, PDD requires the information in all other tuples, including  $(Taxon, Formation)$ ,  $(Formation, TimeInterval)$ , and  $(Formation, Location)$ . We selected taxa common to both PDD and PBDB, and label PDD’s extraction as correct if the taxon temporal ranges overlap.

**Recall.** From the overlapping corpus, PBDB extracts  $(Taxon, TimeInterval)$  tuples for 85 distinct genera in Chinese and 242 distinct genera in German. We find that PDD correctly extracts  $(Taxon, TimeInterval)$  for 24 genera (28%) in Chinese and 82 (33%) genera in German. The difference between Chinese and German is caused primarily by OCR quality, even though we used commercial OCR tools for both. Chinese has lower OCR quality because of the large vocabulary in East-Asian languages.

**Precision.** Out of all 24 distinct genera in Chinese and 82 distinct genera in German articles, we find that all of them overlap with PBDB extractions in terms of their temporal interval, indicating high precision.

## 2 Specific Technical Validation

Here we describe DEEPDIVE, the underlying system that powers PDD [2–7].

### 2.1 Probabilistic Framework

#### 2.1.1 Related Work

*Knowledge Base Construction* (KBC) has been an area of intense study over the last decade [8–19]. Within this space, there are a number of approaches.

**Rule-based Systems.** The earliest KBC systems used pattern matching to extract relationships from text. The most well known example is the “Hearst Pattern” proposed by Hearst [20] in 1992. In her seminal work, Hearst observed that a large amount of hyponyms can be discovered by simple patterns, e.g., “X, such as Y”. Hearst’s technique forms the basis of many further techniques that attempt to extract high quality patterns from text. In industry, rule-based (pattern-matching-based) KBC systems, such as IBM’s SystemT [8, 21], have been built to develop high quality patterns. These systems provide the user a (usually declarative) interface to specify a set of rules and patterns to derive relationships. These systems have achieved state-of-the-art quality after carefully engineering effort as shown by Li et al. [21].

**Statistical Approaches.** One limitation of rule-based systems is that the developer needs to ensure that all rules provided to the system are high precision rules. For the last decade, probabilistic (or machine learning) approaches have been proposed to allow the system select between a range of a priori features automatically. In these approaches, the extracted tuple is associated with a marginal probability that it is true (i.e., that it appears in the KB). DEEPDIVE, Google’s knowledge graph, and IBM’s Watson are built on this approach. Within this space there are three styles of systems:

- **Classification-based Frameworks** Here, traditional classifiers assign each tuple a probability score, e.g., naïve Bayes classifier, and logistic regression classifier. For example, KnowItAll [12] and TextRunner [13, 14] uses naïve Bayes classifier, and CMUs NELL [16, 17] uses logistic regression. Large-scale systems typically use these types of approaches in sophisticated combinations, e.g., NELL or Watson.
- **Maximum a Posteriori (MAP)** Here, the probabilistic approach is used but the MAP or Most likely world (which do differ slightly) is selected. Notable examples include the YAGO system [15], which uses a PageRank-based approach to assign a confidence score. Other examples include the SOFIE [10] and Prospera [11], which use an approach based on constraint satisfaction.
- **Graphical Model Approaches** The classification-based methods ignore the interaction among predictions, and there is a hypothesis that modeling these correlations yields higher quality systems more quickly. A generic graphical model has been used to model the probabilistic distribution among all possible extractions. For example, Poon et al. [19] used Markov logic networks (MLN) [22] for information extraction. Microsoft’s StatisticalSnowBall/EntityCube [18] also uses an MLN-based approach. A key challenge with these systems is scalability. For example, Poon et al. was limited to 1.5K citations. Our relational database driven algorithms for MLN-based systems are dramatically more scalable [3].

### 2.1.2 Calibrated Probabilities

DEEPDIVE takes a Bayesian probabilistic approach to KBC by treating OCR, NLP, image processing, and feature recognition as one joint probabilistic inference problem in which all predictions are modeled as a factor graph (Fig. S3). This probabilistic framework ensures all facts that are produced by DEEPDIVE are associated with a marginal probability.<sup>1</sup> These marginal probabilities are meaningful in DEEPDIVE (i.e., they should correspond to the actual probabilities of a fact being correct), which provides a mechanism for evaluation and an aid to improving the system.

**Calibration.** In DEEPDIVE, *calibration plots* are used as a way to summarize the overall quality of the KBC results. Ideally, the probability associated with a given fact in DEEPDIVE should equal the empirical probability that this fact is correct (i.e., an extraction with a probability 0.95 should be correct with a 95% of the time when inspected in the original source). Because DEEPDIVE uses a joint probability model, any set of predictions can be assigned a marginal probability. Queries can then be against the model to help determine where a model needs improvement.

Supplementary Figure 11 and Supplementary Figure 12 show calibration plots for the ODS and the WDS presented in the main text. We will use Supplementary Figure 11(1) as an example, which is the target relation Taxonomy in the ODS. A calibration plot contains three components: (a) Accuracy, which measures the test-set accuracy of a prediction with a certain probability; (b) # Predictions (Testing Set), which measures the number of extractions in the test set with a certain probability; and (c) # Predictions (Whole Set), which measures the number of extractions in the whole set with certain probability. The difference between test set and whole set is that the former has training labels for each random variable. Results are summarized as histograms, and empirically we find that a bin of size of 0.1 is usually sufficient to understand the behavior of the system.

---

<sup>1</sup>Cox’s theorem asserts (roughly) that if one uses numbers as degrees of belief, then one must either use probabilistic reasoning or risk contradictions in a reasoning system, i.e., probabilistic reasoning is the only sound system for reasoning in this manner [23].

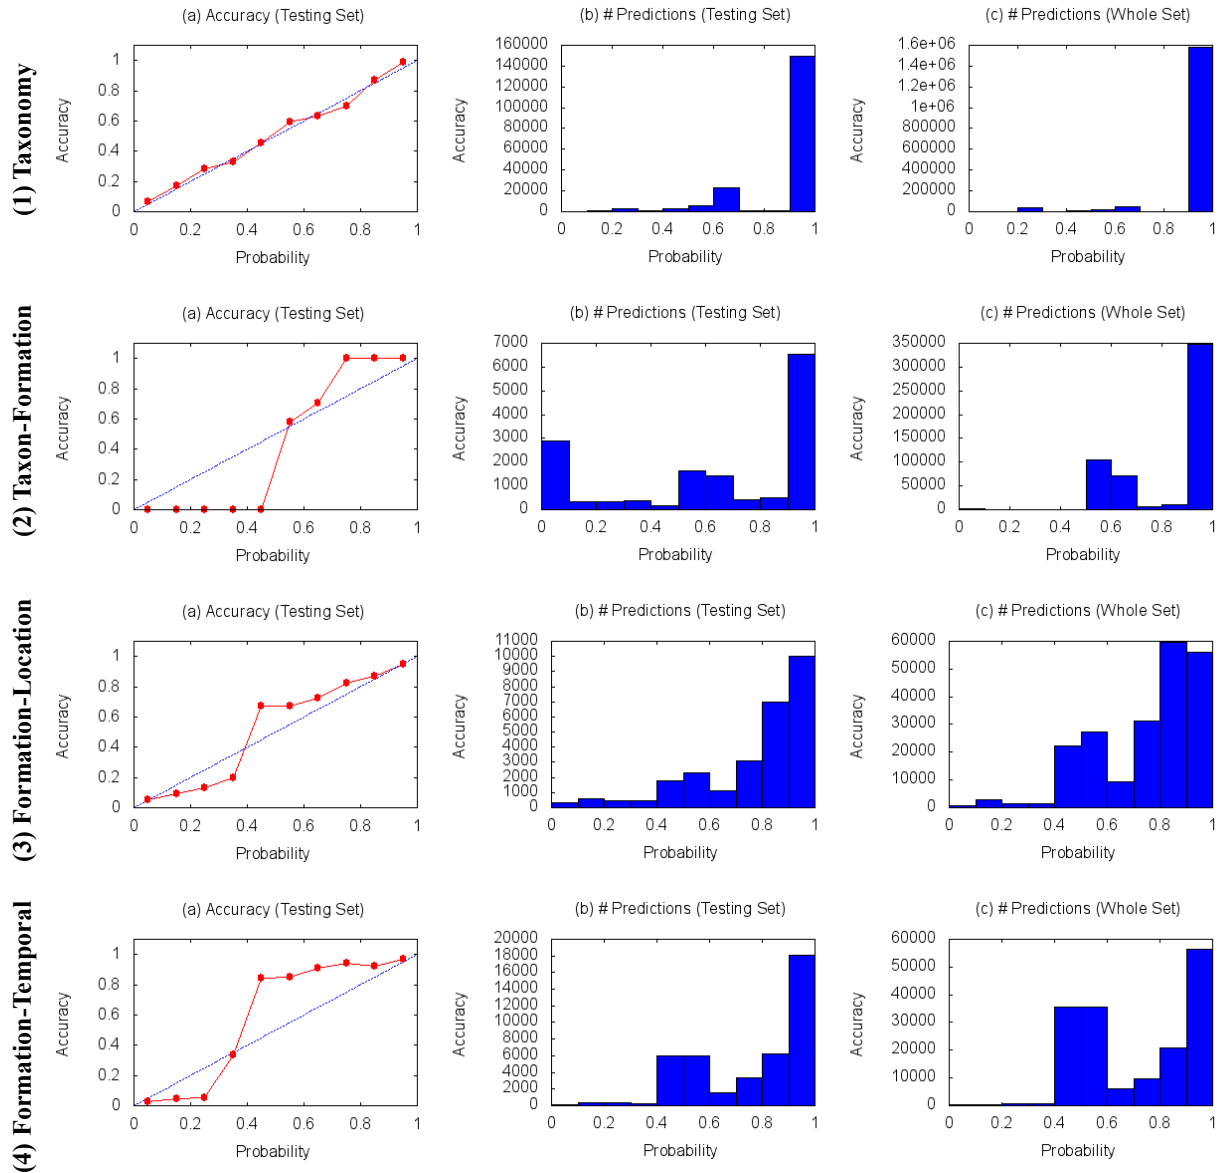

Supplementary Figure 11. Calibration Plots for All Relations on Overlapping Corpus

## Using Calibration Plots

**(a) Accuracy.** If the accuracy curve is similar to the ideal (0,0)-(1,1) line, it means that a probability produced by the system matches the *test-set accuracy*. For example, Supplementary Figure 11(1) shows a reasonably good curve for calibration. Differences in these two lines can be caused by (1) inefficient training data or a small testing corpus, and/or (2) bad mixing behavior of the sampler or other software bugs. For example, Supplementary Figure 12(2,3,4) shows a much better calibration behavior than Supplementary Figure 11(2,3,4), primarily because the former is based on the whole corpus, which has more training data and a larger testing set.

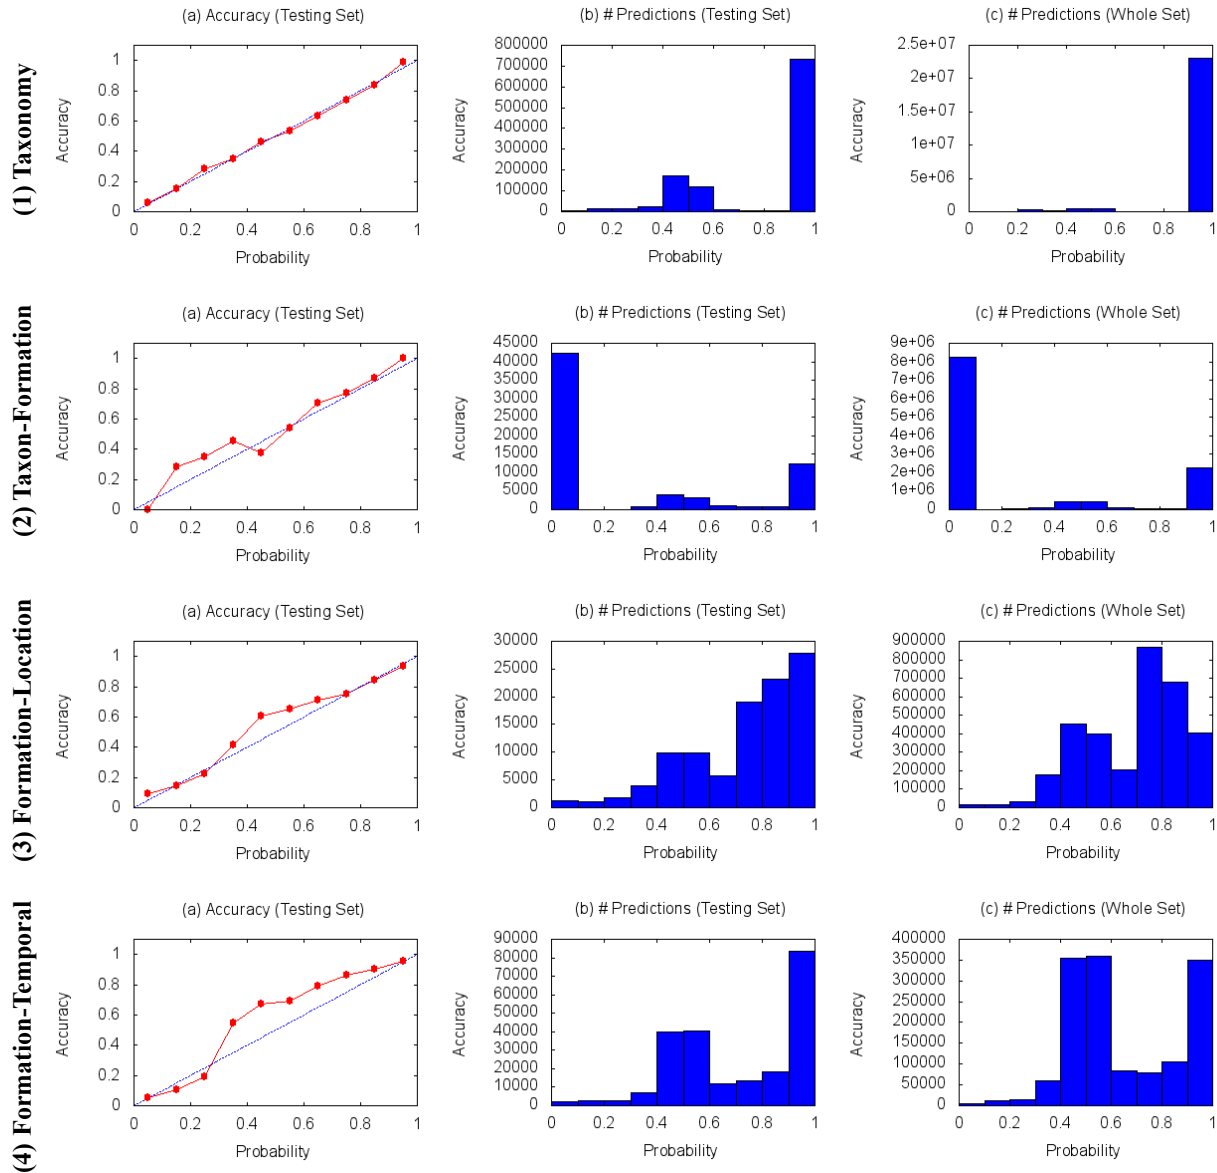

Supplementary Figure 12. Calibration Plots for All Relations on Whole Corpus

**(b) # Predictions (Testing Set).** Ideally, the # Predictions histogram should have a “U” shape. That is, most of the data are concentrate at high probability (where we are confident it is correct) and low probability (where we are confident it is incorrect). Large numbers of predictions with a probability approximately 0.5 means that the system has little information about how to classify these extractions. This implies that more features could be defined to resolve uncertainty. For example, Supplementary Figure 11(2) shows a U-shape curve with some masses around 0.5-0.6. The shape of the histogram relies on the ratio between the number of positive examples and negative examples. When the number of positive examples dominates negative examples and there is a bias term, it is possible that there are very small amount extractions with a probability near 0. Supplementary Figure 11(1,3,4) illustrate this phenomenon.

(c) # Predictions (Whole Set). This histogram is similar to (b), but illustrates the behavior of scaling the system to a set of documents for which we do not have any training examples. Usually we hope that (c) has a similar shape to (b).

**Usage.** The above techniques have proven critical to debugging and improving the quality of PDD. In response to low confidence, a user can provide labeled examples, which allows the system to learn weights that yield higher confidence. Additionally, a user may write logical inference rules that provide ways of improving quality, which is a key component of all statistical relational approaches.

## 2.2 Declarative Interface for Joint Inference and Rich Features

### 2.2.1 Related Work

Here we survey recent efforts that focus on how to improve the quality of a KBC system.

**Rich Features.** Different researchers have recently noted the importance of combining and using a rich set of features and signals to improve the quality of a KBC system. Two famous efforts, the Netflix challenge [24], and IBM’s Watson [25], which won the Jeopardy gameshow, have identified the importance of features and signals:

*Ferrucci et al. [25]: For the Jeopardy Challenge, we use more than 100 different techniques for analyzing natural language, identifying sources, finding and generating hypotheses, finding and scoring evidence, and merging and ranking hypotheses. What is far more important than any particular technique we use is how we combine them in DeepQA such that overlapping approaches can bring their strengths to bear and contribute to improvements in accuracy, confidence, or speed.*

*Buskirk [24]: The top two teams beat the challenge by combining teams and their algorithms into more complex algorithms incorporating everybody’s work. The more people joined, the more the resulting team’s score would increase.*

In both efforts, the rich set of features and signals contributed to the high-quality of the corresponding system. Other researches have found similar phenomena. For example, Mintz et al. [26] finds that although both surface features and deep NLP features have similar quality for relation extraction tasks, combining them achieves a significant improvement over using either one in isolation. Similar “feature-based” approaches are also used in other domains (e.g., Finkel et al. [27] uses a diverse set of features to build a NLP parser with state-of-the-art quality). In our own work [28], we have also found that integrating a diverse set of deep NLP features can improve a table extraction system significantly.

**Joint Inference.** Another recent trend in building KBC system is to take advantage of *joint inference* [5, 19, 28–33]. Different from traditional models [34], such as logistic regression or SVM, joint inference approaches emphasize learning multiple targets simultaneously. For example, Poon et al. [19, 31] find that learning segmentation and extraction in the same Markov logic network significantly improves the quality of information extraction. Similar observations have been made by Min et al. [29] and McCallum [30]. Our recent work also show the empirical improvement of joint inference on the diverse set of tasks, including relation extraction [5] and table extraction [28].

**Deep Learning and Joint Inference.** A recent emerging effort in the machine learning community is to build a fully-joint model for NLP tasks [32, 33]. The goal is to build a single joint model from the lowest level (e.g., POS tagging) to the highest level (e.g., semantic role labeling). The PDD system is built in a similar spirit that attempts to build a joint model for low-level tasks (e.g., OCR), to high-level tasks (e.g., cross-document inference of relation extraction).

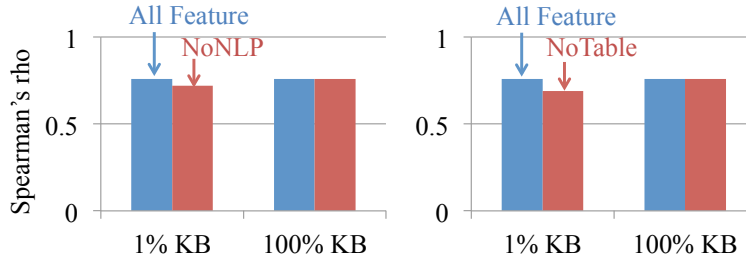

Supplementary Figure 13. Lesion Study of Deep NLP Features and Table Recognition

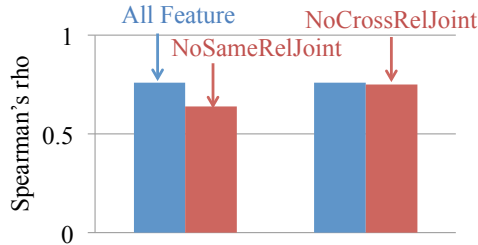

Supplementary Figure 14. Lesion Study of Joint Inference

### 2.2.2 The DeepDive Approach and the Impact of Rich Features and Joint Rules

DEEPDIVE uses joint inference rules and rich features. In this section, we test that these features and rules are important to PDD's quality by conducting a lesion study.

**Protocol.** All experiments were run on the overlapping corpus as described in the main text. We produced variants of PDD by removing features/rules and all components that rely on the output of the removed feature/rule. We summarize the quality of PDD by computing Spearman's rho for first differences in genus-level biodiversity (as in Fig. 1).

**Features.** The PDD feature extraction phase extracts a set of features, including deep linguistic features, e.g., dependency parsing results, and vision-based features (e.g., a simple table extractor based on Hough Transform). To study their impact, we conduct lesion study by sequentially disabling these features.

**Deep NLP Features.** Supplementary Figure 13(a) shows the impact of removing NLP features (e.g., dependency path). If we use the whole PBDB is used, dropping these Deep NLP features does not have a significant effect on Spearman's rho. However, if the knowledge base used for training is reduced to 1% of its size, then dropping NLP features results in a decrease of Spearman's rho from 0.72 to 0.69.

**Vision-based Table Recognition.** PDD contains a table recognition component to detect tables using vision-based features (e.g., Hough Transform). When disabling this component and using the 1% PBDB for distant supervision, PDD achieves a Spearman's rho of 0.69. This drop is the effect of decreased recall of data in tables.

**Joint Inference Rules.** PDD contains a set of factors for joint inference among random variables, as shown in Fig S3. We study their impact on two types of joint inference rules: (1) joint inference within one relation; and (2) joint inference across different relations (Supplementary Figure 14).

**Joint Inference for Same Relations.** Disabling all joint inference rules results in a Spearman’s rho of 0.64, even when using the whole PBDB knowledge base. This is a marked decline from the Spearman’s rho of 0.82 obtained when these rules are enabled. This large decline in quality is caused by the fact that jointly inferring the values of random variable results in much higher-quality predictions. For example, assume that we have three candidate facts that Tsingyuan Formation has the age (1) Carboniferous, (2) Namurian, and (3) Kungurian. In the current PDD system, the higher confidence for Carboniferous will also boost its confidence for Namurian (because of containment), and decrease its confidence for Kungurian (because Kungurian is so much younger than Carboniferous). This type of joint inference between random variables help PDD to produce result with higher recall (by boosting confidence to cross the imposed 0.95 threshold) and precision (by eliminating wrong predictions).

**Joint Inference across Relations.** The current PDD system has three joint inference rules across different relations (e.g., one geologic formation entity mention cannot be concurrently a location mention). We disable these rules and show in Supplementary Figure 14 that it does not have a large impact to the overall quality. This implies that the current PDD system is quite modular across different relations. This means that different types of relations can be decoupled and applied to other related applications (e.g., for biology or geology).

## 2.3 Scalability and High Performance Statistical Inference and Learning

### 2.3.1 Related Work

There is an emerging trend in both industry and academia to support statistical inference and learning, and we survey these efforts in this section.

**Hardware Efficiency.** One line of research tries to speed-up statistical inference and learning by better taking advantage of modern hardware and clusters. For example, many industrial database vendors have integrated statistical analytics components into their product. For example, Oracle’s ORE [35], Pivotal’s MADlib [36], and IBM’s SystemML [37]. These systems provide functionalities like logistic regression and collapsed Gibbs sampling for topic modeling on their data management systems. There are also efforts to design new data processing framework instead of relying on the traditional database systems. Indeed, most data processing frameworks developed in the last few years are designed to support statistical analytics including Mahout [38] for Hadoop, MLI for Spark [39], GraphLab [40], GraphChi [41], and Delite [42, 43]. These systems have been shown to increase the performance of corresponding statistical analytics tasks significantly.

**Statistical Efficiency.** One key difference between statistical inference and learning with traditional SQL-like analytics is that different ways of executing the same tasks usually lead to different speed when converging to the same quality. Therefore, another line of related work, mainly contributed by the mathematical optimization and machine learning community, is to design more efficient algorithms for statistical inference tasks. One of the recent trends is to design lock-free algorithms that can be executed on the emerging multi-socket multi-core machines with high parallelism [3, 44–47]. For example, Tsitsiklis et al. [44] proves asymptotic convergence for a parallel coordinate descent algorithm, and Bradley et al. [47] proves the convergence rate and theoretical speedups for parallel stochastic coordinate descent. Our own work [3, 46] proves the convergence of lock-free execution for stochastic gradient descent and stochastic coordinate descent.

### 2.3.2 The DeepDive Approach and The Performance of PDD

**The DeepDive Approach.** The statistical inference and learning engine in DEEPDIVE [4] is built upon the challenge of designing a high-performance statistical inference and learning engine on a single machine [4, 6, 7, 46]. Compared to traditional work, the main novelty of DEEPDIVE is that it considers *both* hardware efficiency and statistical efficiency for executing an inference and learning task.



**Hardware Efficiency.** DEEPDIVE takes into consideration the architecture of modern non-uniform memory access (NUMA) machines. A NUMA machine usually contains multiple nodes (sockets), where each sockets contains multiple CPU cores. To achieve high hardware efficiency, it is useful to decrease the communication across different NUMA nodes.

**Statistical Efficiency** Pushing hardware efficiency to the extreme might cause statistical efficiency to suffer because the lack of communication between nodes could decrease the rate of convergence of a statistical inference and learning algorithm. DEEPDIVE takes advantage of theoretical results of model averaging [45] and lock-free execution [7, 46].

**Performance of Statistical Inference and Learning.** DEEPDIVE enables PDD’s ability to run statistical inference and learning efficiently. For example, on the whole corpus, the factor graph contains more than 0.2 billion random variables and 0.3 billion factors. On this factor graph, DEEPDIVE is able to run Gibbs sampling on a machine with 4 sockets (10 core per sockets), and we find that we can generate 1,000 samples for all 0.2 billion random variables in 28 minutes.

## References

- [1] Heim, N., Knope, M. & Payne, J. L. Cope’s rule in solitary marine bilaterian animals across the past 540 million years (In Preparation).
- [2] Kumar, A., Niu, F. & Ré, C. Hazy: making it easier to build and maintain big-data analytics. *Commun. ACM* **56**, 40–49 (2013).
- [3] Niu, F., Ré, C., Doan, A. & Shavlik, J. Tuffy: Scaling up statistical inference in markov logic networks using an rdbms. *Proc. VLDB Endow.* **4**, 373–384 (2011). URL <http://dl.acm.org/citation.cfm?id=1978665.1978669>.
- [4] Zhang, C. & Ré, C. Dimmwitted: A study of main-memory statistical analytics. *ArXiv e-print*. (2013).
- [5] Niu, F., Zhang, C., R, C. & Shavlik, J. W. Elementary: Large-scale knowledge-base construction via machine learning and statistical inference. *Int. J. Semantic Web Inf. Syst.* **8**, 42–73 (2012). URL <http://dblp.uni-trier.de/db/journals/ijswis/ijswis8.html#NiuZRS12>.
- [6] Zhang, C. & Ré, C. Towards high-throughput gibbs sampling at scale: A study across storage managers. In *Proceedings of the 2013 ACM SIGMOD International Conference on Management of Data, SIGMOD ’13*, 397–408 (ACM, New York, NY, USA, 2013). URL <http://doi.acm.org/10.1145/2463676.2463702>.
- [7] Niu, F., Recht, B., Re, C. & Wright, S. J. Hogwild: A lock-free approach to parallelizing stochastic gradient descent. In *NIPS*, 693–701 (2011).
- [8] Krishnamurthy, R. *et al.* Systemt: A system for declarative information extraction. *SIGMOD Rec.* **37**, 7–13 (2009). URL <http://doi.acm.org/10.1145/1519103.1519105>.
- [9] Shen, W., Doan, A., Naughton, J. F. & Ramakrishnan, R. Declarative information extraction using datalog with embedded extraction predicates. In *Proceedings of the 33rd International Conference on Very Large Data Bases, VLDB ’07*, 1033–1044 (VLDB Endowment, 2007). URL <http://dl.acm.org/citation.cfm?id=1325851.1325968>.
- [10] Suchanek, F. M., Sozio, M. & Weikum, G. Sofie: A self-organizing framework for information extraction. In *Proceedings of the 18th International Conference on World Wide Web, WWW ’09*, 631–640 (ACM, New York, NY, USA, 2009). URL <http://doi.acm.org/10.1145/1526709.1526794>.

- [11] Nakashole, N., Theobald, M. & Weikum, G. Scalable knowledge harvesting with high precision and high recall. In *Proceedings of the Fourth ACM International Conference on Web Search and Data Mining*, WSDM '11, 227–236 (ACM, New York, NY, USA, 2011). URL <http://doi.acm.org/10.1145/1935826.1935869>.
- [12] Etzioni, O. *et al.* Web-scale information extraction in knowitall: (preliminary results). In *Proceedings of the 13th International Conference on World Wide Web*, WWW '04, 100–110 (ACM, New York, NY, USA, 2004). URL <http://doi.acm.org/10.1145/988672.988687>.
- [13] Yates, A. *et al.* Texrunner: Open information extraction on the web. In *Proceedings of Human Language Technologies: The Annual Conference of the North American Chapter of the Association for Computational Linguistics: Demonstrations*, NAACL-Demonstrations '07, 25–26 (Association for Computational Linguistics, Stroudsburg, PA, USA, 2007). URL <http://dl.acm.org/citation.cfm?id=1614164.1614177>.
- [14] Banko, M., Cafarella, M. J., Soderland, S., Broadhead, M. & Etzioni, O. Open information extraction from the web. In *Proceedings of the 20th International Joint Conference on Artificial Intelligence*, IJCAI'07, 2670–2676 (Morgan Kaufmann Publishers Inc., San Francisco, CA, USA, 2007). URL <http://dl.acm.org/citation.cfm?id=1625275.1625705>.
- [15] Kasneci, G., Ramanath, M., Suchanek, F. & Weikum, G. The yago-naga approach to knowledge discovery. *SIGMOD Rec.* **37**, 41–47 (2009). URL <http://doi.acm.org/10.1145/1519103.1519110>.
- [16] Betteridge, J. *et al.* Toward never ending language learning. In *AAAI Spring Symposium: Learning by Reading and Learning to Read*, 1–2 (2009).
- [17] Carlson, A. *et al.* Toward an architecture for never-ending language learning. In *AAAI* (2010).
- [18] Zhu, J., Nie, Z., Liu, X., Zhang, B. & Wen, J.-R. Statsnowball: A statistical approach to extracting entity relationships. In *Proceedings of the 18th International Conference on World Wide Web*, WWW '09, 101–110 (ACM, New York, NY, USA, 2009). URL <http://doi.acm.org/10.1145/1526709.1526724>.
- [19] Poon, H. & Domingos, P. Joint inference in information extraction. In *Proceedings of the 22Nd National Conference on Artificial Intelligence - Volume 1*, AAAI'07, 913–918 (AAAI Press, 2007). URL <http://dl.acm.org/citation.cfm?id=1619645.1619792>.
- [20] Hearst, M. A. Automatic acquisition of hyponyms from large text corpora. In *Proceedings of the 14th Conference on Computational Linguistics - Volume 2*, COLING '92, 539–545 (Association for Computational Linguistics, Stroudsburg, PA, USA, 1992). URL <http://dx.doi.org/10.3115/992133.992154>.
- [21] Li, Y., Reiss, F. R. & Chiticariu, L. Systemt: A declarative information extraction system. In *Proceedings of the 49th Annual Meeting of the Association for Computational Linguistics: Human Language Technologies: Systems Demonstrations*, HLT '11, 109–114 (Association for Computational Linguistics, Stroudsburg, PA, USA, 2011). URL <http://dl.acm.org/citation.cfm?id=2002440.2002459>.
- [22] Domingos, P. & Lowd, D. *Markov Logic: An Interface Layer for Artificial Intelligence*. Synthesis Lectures on Artificial Intelligence and Machine Learning (Morgan & Claypool Publishers, 2009).
- [23] Jaynes, E. *Probability Theory: The Logic of Science* (Cambridge Univ. Press, 2003).
- [24] Buskirk, E. V. How the netix prize was won. *Wired* (2009).
- [25] Ferrucci, D. A. *et al.* Building watson: An overview of the deepqa project. *AI Magazine* **31**, 59–79 (2010). URL <http://dblp.uni-trier.de/db/journals/aim/aim31.html#FerrucciBCFGKLMNPSW10>.

- [26] Mintz, M., Bills, S., Snow, R. & Jurafsky, D. Distant supervision for relation extraction without labeled data. In *Proceedings of the Joint Conference of the 47th Annual Meeting of the ACL and the 4th International Joint Conference on Natural Language Processing of the AFNLP: Volume 2 - Volume 2*, ACL '09, 1003–1011 (Association for Computational Linguistics, Stroudsburg, PA, USA, 2009). URL <http://dl.acm.org/citation.cfm?id=1690219.1690287>.
- [27] Finkel, J. R., Kleeman, A. & Manning, C. D. Efficient, feature-based, conditional random field parsing. In *ACL*, 959–967 (2008).
- [28] Govindaraju, V., Zhang, C. & Ré, C. Understanding tables in context using standard nlp toolkits. In *ACL (2)*, 658–664 (2013).
- [29] Min, B., Grishman, R., Wan, L., Wang, C. & Gondek, D. Distant supervision for relation extraction with an incomplete knowledge base. In *NAACL* (2013).
- [30] McCallum, A. Joint inference for natural language processing. In *Proceedings of the Thirteenth Conference on Computational Natural Language Learning*, CoNLL '09, 1–1 (Association for Computational Linguistics, Stroudsburg, PA, USA, 2009). URL <http://dl.acm.org/citation.cfm?id=1596374.1596376>.
- [31] Poon, H. & Vanderwende, L. Joint inference for knowledge extraction from biomedical literature. In *Human Language Technologies: The 2010 Annual Conference of the North American Chapter of the Association for Computational Linguistics*, HLT '10, 813–821 (Association for Computational Linguistics, Stroudsburg, PA, USA, 2010). URL <http://dl.acm.org/citation.cfm?id=1857999.1858122>.
- [32] Collobert, R. & Weston, J. A unified architecture for natural language processing: Deep neural networks with multitask learning. In *Proceedings of the 25th International Conference on Machine Learning*, ICML '08, 160–167 (ACM, New York, NY, USA, 2008). URL <http://doi.acm.org/10.1145/1390156.1390177>.
- [33] Collobert, R. *et al.* Natural language processing (almost) from scratch. *Journal of Machine Learning Research* **12**, 2493–2537 (2011). URL <http://leon.bottou.org/papers/collobert-2011>.
- [34] Mitchell, T. M. *Machine Learning* (McGraw-Hill, USA, 1997).
- [35] Oracle R Enterprise. [docs.oracle.com/cd/E27988\\_01/doc/doc.112/e26499.pdf](https://docs.oracle.com/cd/E27988_01/doc/doc.112/e26499.pdf).
- [36] Hellerstein, J. M. & et al. The MADlib analytics library: Or MAD skills, the SQL. *PVLDB* 1700–1711 (2012).
- [37] Ghoting, A. & et al. SystemML: Declarative machine learning on MapReduce. In *ICDE* (2011).
- [38] Apache Mahout. [mahout.apache.org](http://mahout.apache.org).
- [39] Sparks, E. & et al. MLI: An API for distributed machine learning. In *ICDM*, 1187–1192 (2013).
- [40] Low, Y. & et al. Distributed GraphLab: A framework for machine learning in the cloud. *PVLDB* 716–727 (2012).
- [41] Kyrola, A., Blelloch, G. & Guestrin, C. Graphchi: Large-scale graph computation on just a pc. In *Proceedings of the 10th USENIX Conference on Operating Systems Design and Implementation*, OSDI'12, 31–46 (USENIX Association, Berkeley, CA, USA, 2012). URL <http://dl.acm.org/citation.cfm?id=2387880.2387884>.
- [42] Chafi, H. *et al.* A domain-specific approach to heterogeneous parallelism. In *PPOPP*, 35–46 (2011).
- [43] Sujeeth, A. K. & et al. OptiML: An Implicitly Parallel Domain-Specific Language for Machine Learning. In *ICML*, 609–616 (2011).

- [44] Tsitsiklis, J., Bertsekas, D. & Athans, M. Distributed asynchronous deterministic and stochastic gradient optimization algorithms. *IEEE Transactions on Automatic Control* 803–812 (1986).
- [45] Zinkevich, M. & et al. Parallelized stochastic gradient descent. In *NIPS*, 2595–2603 (2010).
- [46] Liu, J. & et al. An asynchronous parallel stochastic coordinate descent algorithm. *ICML* (2014).
- [47] Bradley, J. K., Kyrola, A., Bickson, D. & Guestrin, C. Parallel coordinate descent for l1-regularized loss minimization. In *ICML*, 321–328 (2011).
